# Supplementary material
Source: PubMed Central journal article supplement (PMC3859405)
Supplement: JCI70395sd.pdf [file JCI70395sd.pdf]

**Supplemental Tables/Figures:**

**Supplemental Table 1:** Demographic Characteristics of Cohort I from Wayne State University

|                             | Control                                                          | Heroin                                            |
|-----------------------------|------------------------------------------------------------------|---------------------------------------------------|
| N                           | 7                                                                | 8                                                 |
| Sex                         | 7 M                                                              | 1 F/7M                                            |
| Age                         | 46.14 ± 7.58                                                     | 41.13 ± 10.13                                     |
| Race                        | 3 B/ 4 W                                                         | 4 B/4 W                                           |
| Brain pH                    | 6.39 ± 0.15                                                      | 6.43 ± 0.1                                        |
| PMI                         | <24 hours                                                        | <24 hours                                         |
| Toxicology                  |                                                                  |                                                   |
| ETOH present (n)            | + (4)                                                            | + (3)                                             |
| Blood EtOH levels (g/L)     | 0.08 ± 0.09                                                      | 0.05 ± 0.08                                       |
| Blood morphine levels (g/L) | n.d.                                                             | 0.348 ± 0.52                                      |
| Cause of Death              | ASCVD(n=4),<br>GSW (n=1), stab<br>wound (n=1),<br>drowning (n=1) | Heroin abuse<br>(n=7),<br>cardiomyopathy<br>(n=1) |

B= Black, W= White, F=female, M=male, n.d. = not detectable, ASCVD= atherosclerotic cardiovascular disease, GSW= gun shot wound.

**Supplemental Table 2:** Characteristics and Demographic Variables of Cohort II-Hungarian Heroin Population

|                      | Control                                                                          | Heroin                       |
|----------------------|----------------------------------------------------------------------------------|------------------------------|
| N                    | 18                                                                               | 28                           |
| Sex                  | 3 F/ 15 M                                                                        | 5 F/23 M                     |
| Age                  | 35.11 ± 12.37                                                                    | 27.07 ± 5.26                 |
| Race                 | European Caucasian                                                               | European Caucasian           |
| Brain pH             | 6.73 ± 0.21                                                                      | 6.56 ± 0.21                  |
| PMI                  | <24                                                                              | <24                          |
| Toxicology           |                                                                                  |                              |
| ETOH present (n)     | + (1)                                                                            | + (3)                        |
| Blood EtOH (g/L)     | 0.07 ± 0.20                                                                      | 0.16 ± 0.49                  |
| Blood Morphine (g/L) | n.d.                                                                             | 0.337 ± 0.44                 |
| Cause of Death       | ASCVD (14)<br>Electric Shock (1)<br>Viral infection (2)<br>Pulmonary Embolus (2) | Heroin intoxication/overdose |

F=female, M=male, n.d. = not detectable, ASCVD= atherosclerotic cardiovascular disease.

**Supplemental Table 3:** Demographic Characteristics of the Major Depressive Population

|                 | Control               | Major Depressive        |
|-----------------|-----------------------|-------------------------|
| N               | 10                    | 14                      |
| Sex             | 3F/7M                 | 6 F/8M                  |
| Age             | 33.10 ± 9.90          | 36.20 ± 12.90           |
| Race            | European<br>Caucasian | European<br>Caucasian   |
| Brain pH        | 6.82 ± 0.10           | 6.83 ± 0.08             |
| PMI             | < 24 hours            | <24 hours               |
| Manner of death | Cardiac Arrest        | Suicide by asphyxiation |

F=female, M=male.

**Supplemental Figure 1 - Cohort 1 Heroin abusers have reduced PDYN mRNA expression in the PAC.** AB, accessory basal; AHA, amygdalohippocampal area; PAC, periamygdaloid cortex. \*,  $p < 0.05$  according to ANOVA analysis. Values are expressed in DPM/mg (mean  $\pm$  SEM) ( $n_{\text{Control}}=7$  and  $n_{\text{Heroin}}=8$ ).

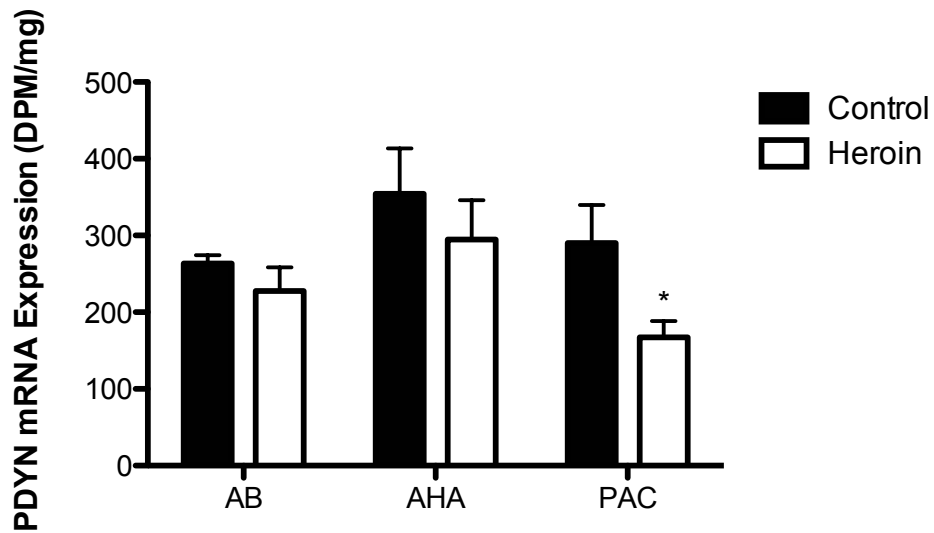

**Supplemental Figure 2: Cohort II Heroin abusers have significant reduction of PDYN mRNA expression in the PAC.** Values are expressed in DPM/mg (mean  $\pm$  SEM). ( $n_{\text{Control}}=18$  and  $n_{\text{Heroin}}=28$ ) \*,  $p<0.05$  according to ANOVA or Welch's analysis.

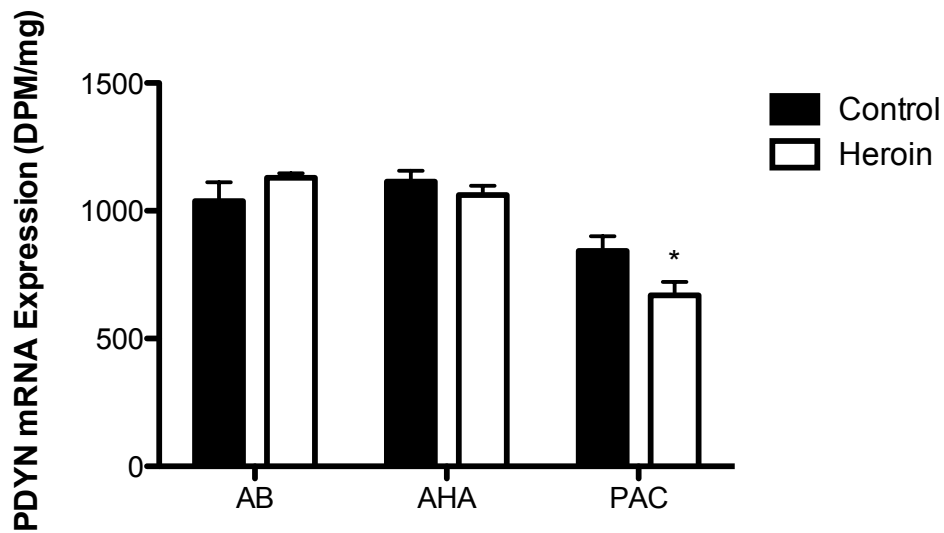

**Supplemental Figure 3: MDD subjects have reduced PDYN mRNA expression in several amygdala nuclei.** Values are expressed in DPM/mg as mean  $\pm$  SEM ( $n_{\text{Control}}=10$ ,  $n_{\text{MDD}}=14$ ). \*,  $p<0.05$  according to an ANOVA/ Welch's analysis.

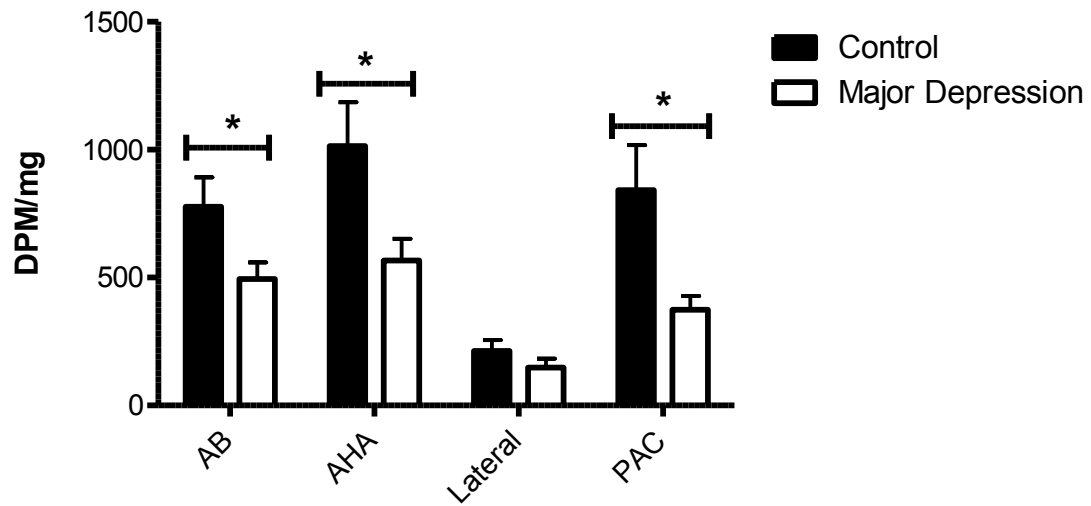

Supplemental Figure 4 – Map of viral vectors used in experiments

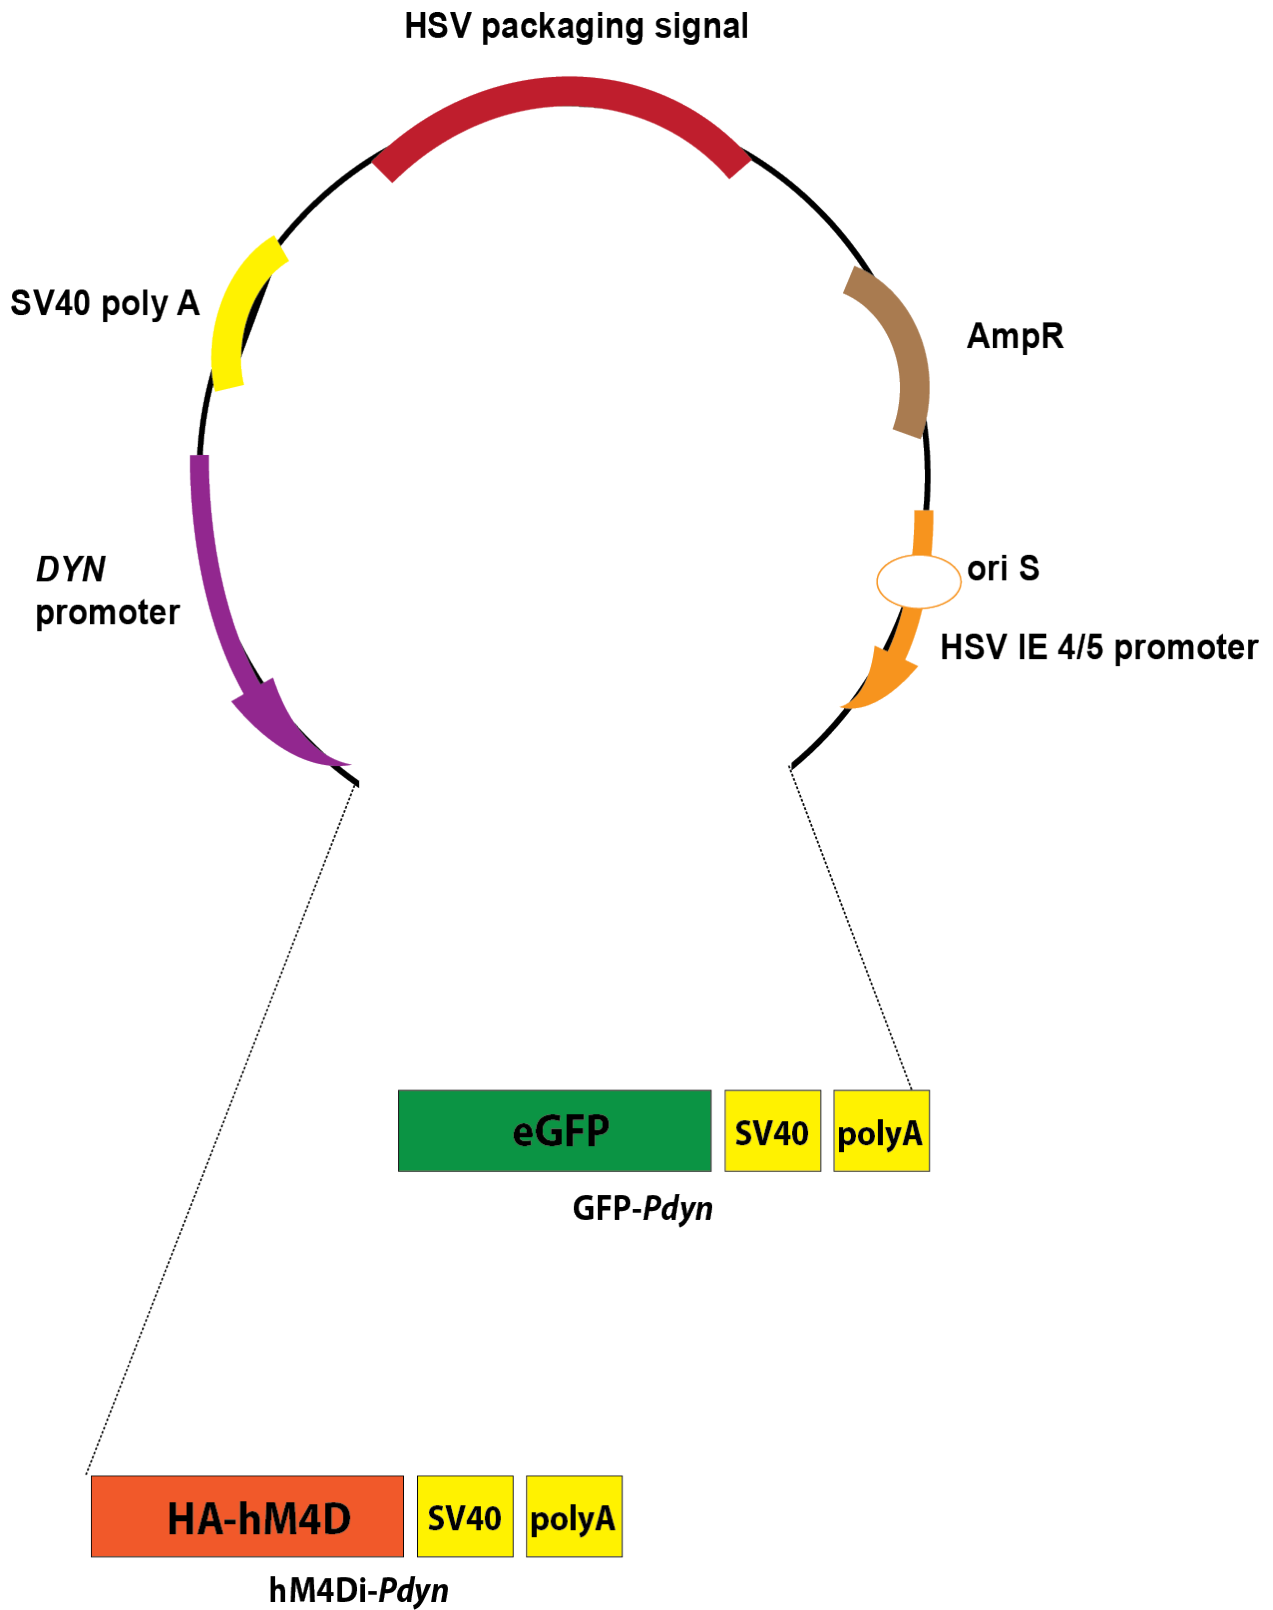

**Supplemental Figure 5- Metabolic Mapping resulting from inhibitory hm4di-Pdyn infusion in the PAC using the DREAMM**

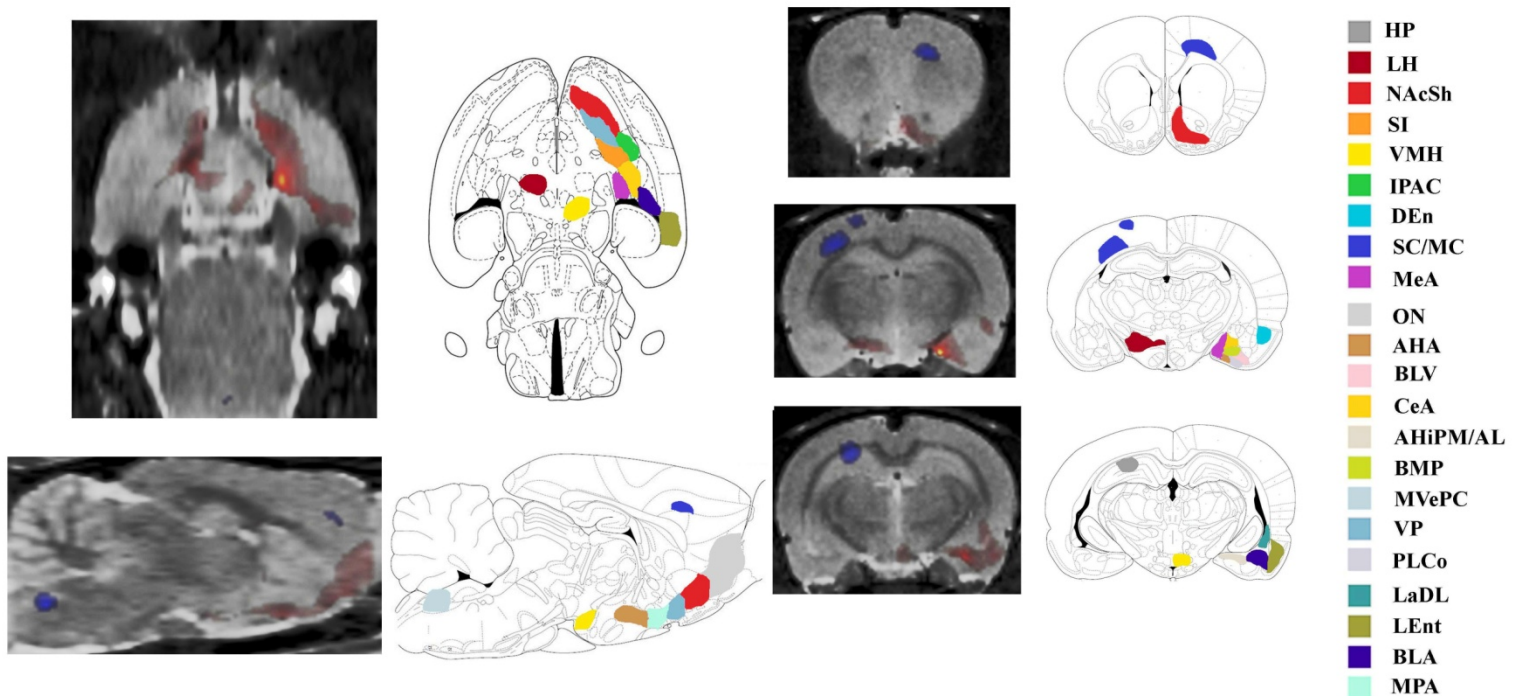

**Abbreviations:**

- HP: Hippocampus
- LH: Lateral Hypothalamus
- NAcSh: Nucleus Accumbens shell
- SI: substantia innominata
- VMH: ventral medial hypothalamus
- IPAC: interstitial nucleus of posterior limb of anterior commissure
- DEn: dorsal endopiriform nucleus
- SC/MC: sensory cortex/motor cortex
- AHA: anterior hypothalamic area, anterior part
- BLV: basolateral amygdala, ventral part
- CeA: central amygdala
- AHiPM/AL: amygdalaohippocampal area, posteriomedial, anterolateral
- BMP: basomedial amygdala nucleus, posterior
- MVePC: medival vestibular nucleus, parvicellular part
- VP: Ventral pallidum
- PLCO: posterolateral cortical nucleus
- LaDL: lateral amygdaloid nucleus, dorsolateral part
- Lent: lateral entorhinal cortex
- BLA: Basolateral amygdala
- MPA: medial preoptic area



**Supplemental Figure 6:** CNO administration has no effect on corticosterone levels in GFP-Pdyn animals ( $p=0.55$ , within subjects t-test)

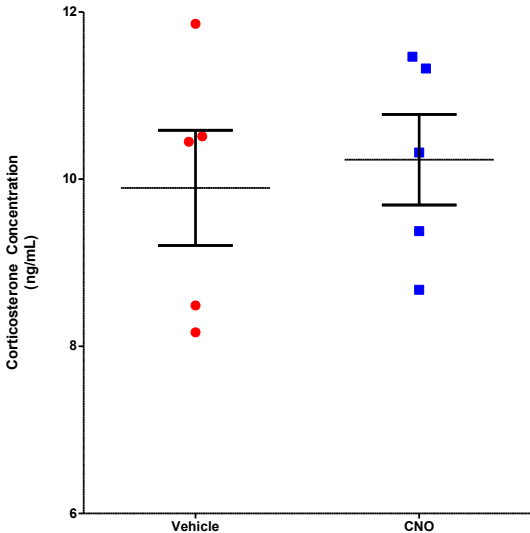

**Supplemental Figure 7:** Total distance of rats in open field locomotor arena over a 60 minute time period

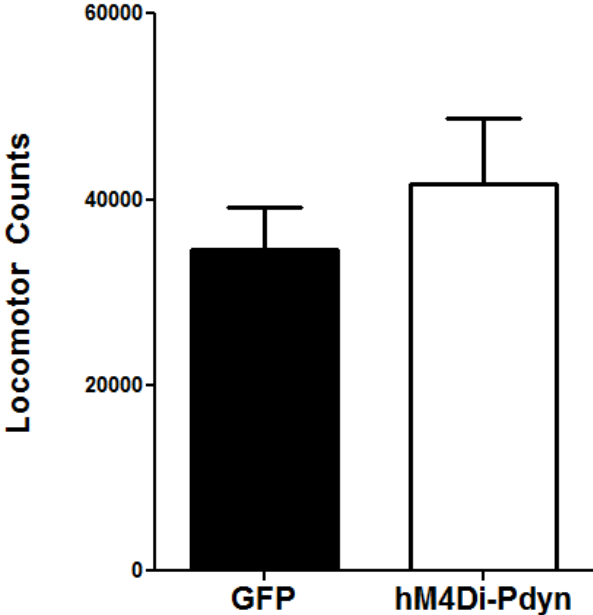

## Supplemental Methods:

### Analysis Used in DREADD-assisted metabolic mapping (DREAMM)

All scans were reconstructed using the *maximum a posteriori* (MAP) algorithm as previously described<sup>8</sup>. After reconstruction, images were spatially processed and normalized using the Pixel-wise Modeling software suite (PMOD) (PMOD Inc., Zurich, Switzerland) to a rat brain MRI template set to Paxinos & Watson stereotaxic coordinates. Constraining the reconstruction of the metabolic images into MRI-derived neuroanatomical templates, significantly improves both the sensitivity and anatomical specificity to detect alterations in FDG uptake using SPM<sup>18,19</sup>. As such, normalized scans were then analyzed using statistical parametric mapping (SPM) as previously described<sup>20</sup>. All SPM contrasts consisted of paired t-tests within each group (e.g. VEH>CNO, VEH<CNO) and were evaluated at the uncorrected  $p=0.05$  level as per our *a priori* hypotheses. Only clusters of at least 100 contiguous voxels were reported. For quantitative analysis of regional SPM differences we modified an SPM region of interest (ROI) toolbox (MarsBaR v0.43) for use with our rat stereotaxic MRI atlas. For the CeA coordinates were: ML: 3.5→4.3, DV: 7.5→8.5, AP: -1.6→-2. For the BNST: ML: 0.8→1.3, DV: 6.8→7.2, AP: -0.8→-1.1. For the NAc Shell: ML: -0.3→-0.7, DV: 7.4→7.9, AP: 1.5→1.8. For the MeA: ML: 2.4→3.2, DV: 8.4→9, AP: -1.6→-2. Stereotaxic coordinates were entered into MarsBaR for the brain areas of interests, which allowed the extraction of individual subject data for each stereotaxically-defined brain area. Each region of interest investigated represents a voxel, which is a 3-Dimensional construction of that area and the analyses done in this area refer to changes in voxel intensity.
